# Supplementary material for: Metallothioneins of the urochordateOikopleura dioicahave Cys-rich tandem repeats, large size and cadmium-binding preference
Source: Royal Society of Chemistry journal article supplement (doi:10.1039/c8mt00177d), 2018-01-01
Supplement: c8mt00177d2.pdf [file c8mt00177d2.pdf]

**Table S1. Accession numbers of SRA sequences used for *OdMT2* cDNA reconstruction**

SRR1693766.108467.2  
SRR1693766.3371994.1  
SRR1693766.3441030.1  
SRR1693766.3698004.1  
SRR1693766.4545152.1  
SRR1693766.4545152.2  
SRR1693766.4883353.1  
SRR1693766.4883353.2  
SRR1693766.6889256.2  
SRR1693766.7376164.1  
SRR1693767.211882.1  
SRR1693767.461625.1  
SRR1693767.461625.2  
SRR1693767.5982171.1  
SRR1693767.7626983.2  
SRR1693767.7849746.1  
SRR1693767.8124551.1  
SRR1693767.11209530.1
